# Supplementary material for: Cyclin-dependent kinase 5 stabilizes hypoxia-inducible factor-1α: a novel approach for inhibiting angiogenesis in hepatocellular carcinoma
Source: Oncotarget. 2016 Mar 24;7(19):27108–21. doi: 10.18632/oncotarget.8342 (PMC5053636; doi:10.18632/oncotarget.8342)
Supplement: Supplementary file 1 [file oncotarget-07-27108-s001.pdf]

# **Cyclin-dependent kinase 5 stabilizes hypoxia-inducible factor-1 $\alpha$ : a novel approach for inhibiting angiogenesis in hepatocellular carcinoma**

## **Supplementary Material**

### **Methods**

#### **Transfection procedures**

HUVECs were either transfected with a Targefect/Virofect mixture used for siRNA or a Targefect/Peptide Enhancer mixture used for plasmids (Targeting Systems, USA) or by electroporation using Nucleofector<sup>TM</sup>II (Amaxa, Germany) according to the manufacturer's protocol. HUH7 cells were transfected with DharmaFECT Transfection reagent (Thermo Scientific, USA) following the manufacturer's instructions.

*CDK5 siRNA:* CDK5 was silenced with an equal mixture of two different ON-TARGETplus CDK5 siRNAs (J-003239-09 and J-003239-10; Dharmacon, USA). ON-TARGETplus Non-targeting (nt) siRNA (D-001810-01; Dharmacon, USA) served as a control.

*CDK5 shRNA:* In HUH7 cells CDK5 silencing by shRNA was performed as previously described<sup>1</sup>. Cdk5 MISSION® shRNA Lentiviral Transduction Particles (Vector: pLKO.1-puro; SHCLNV-NM\_004935; Clone ID: (1) TRCN0000021465, (2) TRCN0000021466, (3) TRCN0000021467, (4) TRCN0000194974, (5) TRCN0000195513; Sigma-Aldrich, Germany) and MISSION® pLKO.1-puro Non-Mammalian shRNA Control Transduction Particles (Sigma-Aldrich SHC002V, Germany) were used according to the manufacturer's protocol.

*CDK5 overexpression:* HUVECs and HUH7 cells were cotransfected with 3  $\mu$ g of CDK5-HA (Addgene 1872, van den Heuvel S.<sup>2</sup>) and P35 (Addgene 1347, Tsai Li-Huei), respectively. Transfection of 3  $\mu$ g of pCMV-Neo-Bam (Addgene, 16440, Vogelstein B.<sup>3</sup>) served as a control.

*S687A and S687E HA-HIF-1 $\alpha$* : 3  $\mu$ g of Alanine-mutated HIF (S687A) and glutamate-mutated HIF (S687E), generated by site-directed mutagenesis, were transfected into HUH7 cells followed by an incubation time of 24 h. Wildtype HIF-1 $\alpha$  (wt, Addgene 18949, Kaelin W. <sup>4</sup>) and an empty pcDNA3 (Invitrogen, Germany) vector served as control (3  $\mu$ g, 24 h). For Luciferase assay 0.3  $\mu$ g of either pcDNA3, wt, S687A or S687E vector were used for transfection.

*pGL4.27(HIF-REluc2P), pGL4.74(hRluc/TK)*: HUH7 cells were transfected with 3  $\mu$ g of the firefly luciferase containing vector pGL4.27(HIF-REluc2P) (Promega, USA) and with 0.3  $\mu$ g of the renilla luciferase containing vector pGL4.74(hRluc/TK) (Promega E692A, USA).

## **Western Blot**

Membranes were incubated with primary antibodies overnight at 4°C (Actin, Santa Cruz sc-1615, 1:1000;  $\beta$ -Tubulin, Cell Signaling 2146, 1:1000; CDK5 Invitrogen AHZ0492, 1:1000; HA Covance MMS-101R, 1:1000; HIF-1 $\alpha$ , BD Biosciences 610958, 1:750, Src, Cell Signaling 2110, 1:1000, phospho-Src (Tyr 416) Cell Signaling 6943, 1:1000). Dependent on the detection system the membranes were incubated with different secondary antibodies (2 h, RT): HRP-coupled (anti-mouse, Biozol, BZL07046; anti-rabbit, Dianova, 111-035-144) antibodies were used for chemiluminescence detection by x-ray films whereas IR-fluorescent Reagent conjugated antibodies (Invitrogen, A – 21057, A – 21109; LI-COR IRDye®, 926-32210D, 926-32211D) were used to detect the bands via fluorescence signal at the Odyssey Infrared Imaging system version 2.1 (LI-COR Biosciences, USA).

## **Mass spectrometry**

*Mass spectrometry of in vitro phosphorylated HIF-1 $\alpha$* : 250 ng of HIF-1 $\alpha$  (50 ng/ $\mu$ l) was reduced for 30 minutes with 0.5  $\mu$ l 45 mM dithiothreitol and alkylated with 0.5  $\mu$ l 100 mM iodoacetamide for 30 minutes in the dark. Tryptic digestion was done overnight with 5 ng trypsin (Promega,

Madison, USA) at 37°C. LC-MS/MS analysis was performed on a NanoLC Ultra system (Eksigent, CA, USA) coupled to an LTQ Orbitrap XL mass analyzer (Thermo Fisher Scientific, CA, USA). As mobile phase A 0.1% formic acid and as mobile phase B 84% acetonitrile/0.1% formic acid was used. The samples were injected onto a C18 trap column (C18 PepMap100, Particle size: 5 µm, 100 Å, Column size: 300 µm x 5 mm, Dionex, CA, USA) and separated on a reversed phase column (Reposil-Pur C18 AQ, 3 µm; 150 mm x 75 µm, Dr. Maisch, Germany) at flow rate of 280 nl/min using two consecutive gradients (1 to 30% B in 120 minutes and 30 to 60% B in 10 minutes). Mass spectra were acquired in cycles of one MS Orbitrap scan followed by five data dependent ion trap MS/MS scans (CID, collision energy of 35%). MS data were analyzed with MASCOT 2.4 (Matrix Science, UK) using the human subset of the SwissProt Database and the following parameters: a) "Fixed modifications": Carbamidomethyl (C) b) Variable modifications: Oxidation (M); c) Decoy database: checked, d) Peptide charge: 2+ and 3+; e) Peptide tol. ±: 10 ppm; f) MS/MS tol. ±: 0.8 Da.

*Mass spectrometry of immunoprecipitated HIF-1α:* The gel slice containing HIF-1α was equilibrated twice with 50 mM NH<sub>4</sub>HCO<sub>3</sub> for 10 minutes. For reduction and alkylation the gel slice was incubated in 45 mM dithiothreitol (30 minutes, 55 °C), followed by an incubation in 100 mM iodoacetamide (30 minutes). Tryptic digestion was performed overnight at 37°C with 100 ng porcine trypsin (Promega, WI, USA). Peptides were further extracted from the gel slices with 50 mM NH<sub>4</sub>HCO<sub>3</sub> followed by a 80% acetonitrile wash. Chromatography was performed with an Ettan MDLC system (GE Healthcare, Germany) coupled to an LTQ ion trap mass spectrometer (Thermo Fisher Scientific, CA, USA). Injection was performed as described for the *in vitro* phosphorylated HIF-1α and separation on a Reprosil-Pur C18 AQ column (3 µm; 150 mm x 75 µm, Dr. Maisch, Germany) applying consecutive gradients from 1 to 30% B in 80 minutes and 30 to 60% B in 30 minutes at a flow rate of 280 nl/min (solvent A: 0.1% formic acid in water, solvent B: 0.1% formic acid in 84% acetonitrile). MS acquisition was performed in cycles of one MS-scan followed by three data dependent ion trap MS/MS scans (collision energy 35%). MS

data were analyzed as described for the *in vitro* phosphorylated HIF-1 $\alpha$  sample with the difference that a peptide tolerance of  $\pm$ : 2 Da was used.

### **Image Analysis**

Fluorescence signals were quantified using ImageJ and integrated density of fluorescence detected in the nucleus compared to total fluorescence. For the analysis 8-bit pictures of CDK5 and Hoechst channels were used. Integrated density was first measured of the CDK5 channel representing the total fluorescence intensity. Hoechst Channel was then adjusted by applying Auto Threshold (Method Triangle) and colours inverted. By Image Calculator Hoechst Channel was subtracted from CDK5 channel resulting in a new channel showing only the fluorescence signal in the nuclei of the cells. Integrated density was measured again and percentages of fluorescence intensity in the nuclei compared to total fluorescence calculated.

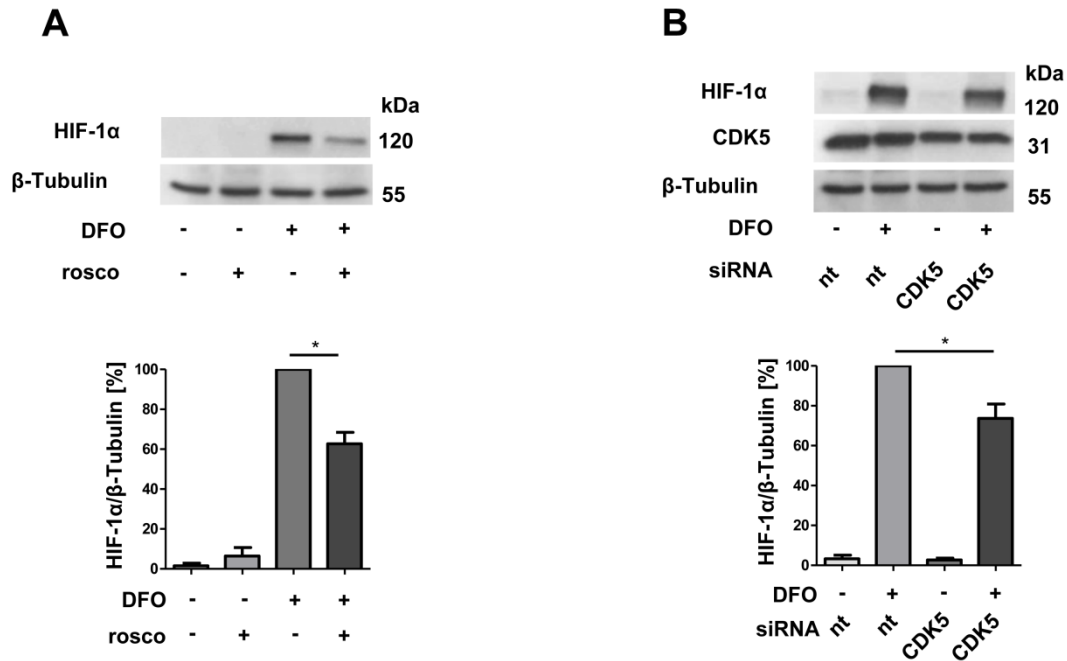

**Supplementary Fig. 1: The protein level of HIF-1α also correlates with CDK5 protein level in human hepatic sinusoidal endothelial cells. (A)** Immunoblots of lysates from HHSECs for HIF-1α and β-Tubulin. Cells were pretreated with roscovitine (30 μM) for 30 minutes, followed by DFO stimulation (100 μM) for 6 h. The quantification of the corresponding immunoblot is shown. One Way ANOVA on Newman-Keuls, \*  $P < .05$ ,  $n = 4$ . **(B)** Immunoblots of lysates from HHSECs for HIF-1α and β-Tubulin. CDK5 was transiently down-regulated by siRNA. Cells were stimulated with DFO (100 μM) for 6 h. The quantification of the corresponding immunoblot is shown. One Way ANOVA on Newman-Keuls, \*  $P < .05$ ,  $n = 4$ .

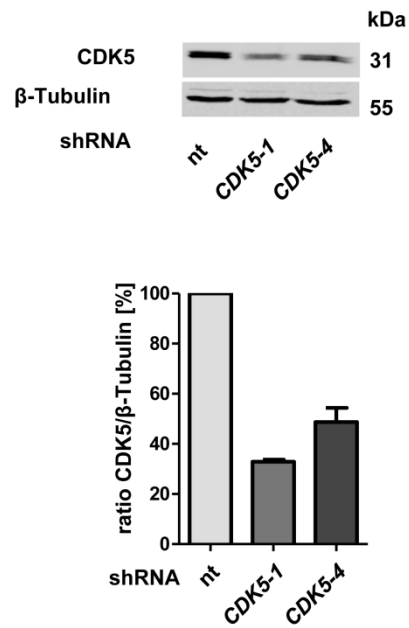

**Supplementary Fig. 2: Knockdown level of two independent HUH7 CDK5 knockdown**

**clones.** Immunoblot for CDK5 and HIF-1 $\alpha$  of lysates from HUH7 cells, either transfected with nt shRNA or *CDK5* shRNA is shown. The CDK5 knockdown level of CDK5 knockdown clone 1 and 4 in comparison to the control is summarized in the graph.

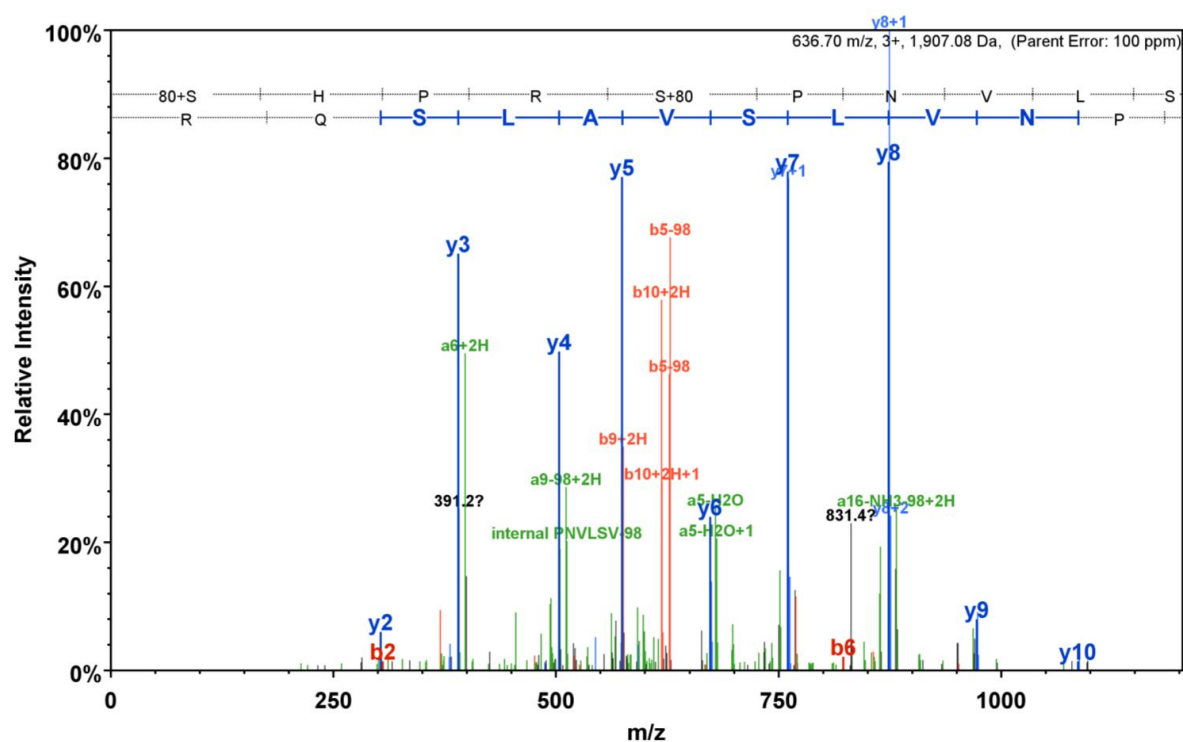

| B  | B Ions       | B+2H         | B-NH3   | B-H2O        | AA          | Y Ions         | Y+2H         | Y-NH3        | Y-H2O          | Y  |
|----|--------------|--------------|---------|--------------|-------------|----------------|--------------|--------------|----------------|----|
| 1  | 168.0        | 84.5         |         | 150.0        | <b>S+80</b> | 1,907.9        | 954.4        | 1,890.9      | 1,889.9        | 16 |
| 2  | <b>305.1</b> | 153.0        |         | 287.1        | H           | 1,740.9        | 870.9        | 1,723.9      | 1,722.9        | 15 |
| 3  | 402.1        | 201.6        |         | 384.1        | P           | 1,603.8        | 802.4        | 1,586.8      | 1,585.8        | 14 |
| 4  | 558.2        | 279.6        | 541.2   | <b>540.2</b> | R           | 1,506.8        | 753.9        | 1,489.8      | 1,488.8        | 13 |
| 5  | 725.2        | 363.1        | 708.2   | <b>707.2</b> | <b>S+80</b> | 1,350.7        | 675.8        | 1,333.7      | 1,332.7        | 12 |
| 6  | <b>822.3</b> | 411.6        | 805.2   | 804.3        | P           | 1,183.7        | <b>592.3</b> | 1,166.7      | 1,165.7        | 11 |
| 7  | 936.3        | 468.7        | 919.3   | 918.3        | N           | <b>1,086.6</b> | <b>543.8</b> | 1,069.6      | <b>1,068.6</b> | 10 |
| 8  | 1,035.4      | 518.2        | 1,018.4 | 1,017.4      | V           | <b>972.6</b>   | <b>486.8</b> | 955.6        | 954.6          | 9  |
| 9  | 1,148.5      | <b>574.7</b> | 1,131.4 | 1,130.5      | L           | <b>873.5</b>   | 437.3        | <b>856.5</b> | 855.5          | 8  |
| 10 | 1,235.5      | <b>618.3</b> | 1,218.5 | 1,217.5      | S           | <b>760.4</b>   | <b>380.7</b> | 743.4        | <b>742.4</b>   | 7  |
| 11 | 1,334.6      | <b>667.8</b> | 1,317.5 | 1,316.6      | V           | <b>673.4</b>   | 337.2        | 656.4        | 655.4          | 6  |
| 12 | 1,405.6      | 703.3        | 1,388.6 | 1,387.6      | A           | <b>574.3</b>   | 287.7        | 557.3        | 556.3          | 5  |
| 13 | 1,518.7      | 759.8        | 1,501.7 | 1,500.7      | L           | <b>503.3</b>   | 252.2        | 486.3        | 485.3          | 4  |
| 14 | 1,605.7      | 803.4        | 1,588.7 | 1,587.7      | S           | <b>390.2</b>   | 195.6        | 373.2        | <b>372.2</b>   | 3  |
| 15 | 1,733.8      | 867.4        | 1,716.8 | 1,715.8      | Q           | <b>303.2</b>   | 152.1        | 286.2        |                | 2  |
| 16 | 1,907.9      | 954.4        | 1,890.9 | 1,889.9      | R           | 175.1          | 88.1         | 158.1        |                | 1  |

**Supplementary Fig. 3: MS/MS spectrum and fragmentation table of peptide**

<sup>683</sup>**SHPRSPNVLSVALSQR**<sup>698</sup> of HIF-1 $\alpha$ . The phosphorylated serines within the peptide sequence are underlined and marked as bold. Detected b ions are highlighted in red and y ions are highlighted in blue. Further signals which could be assigned to other fragment types are highlighted in green.

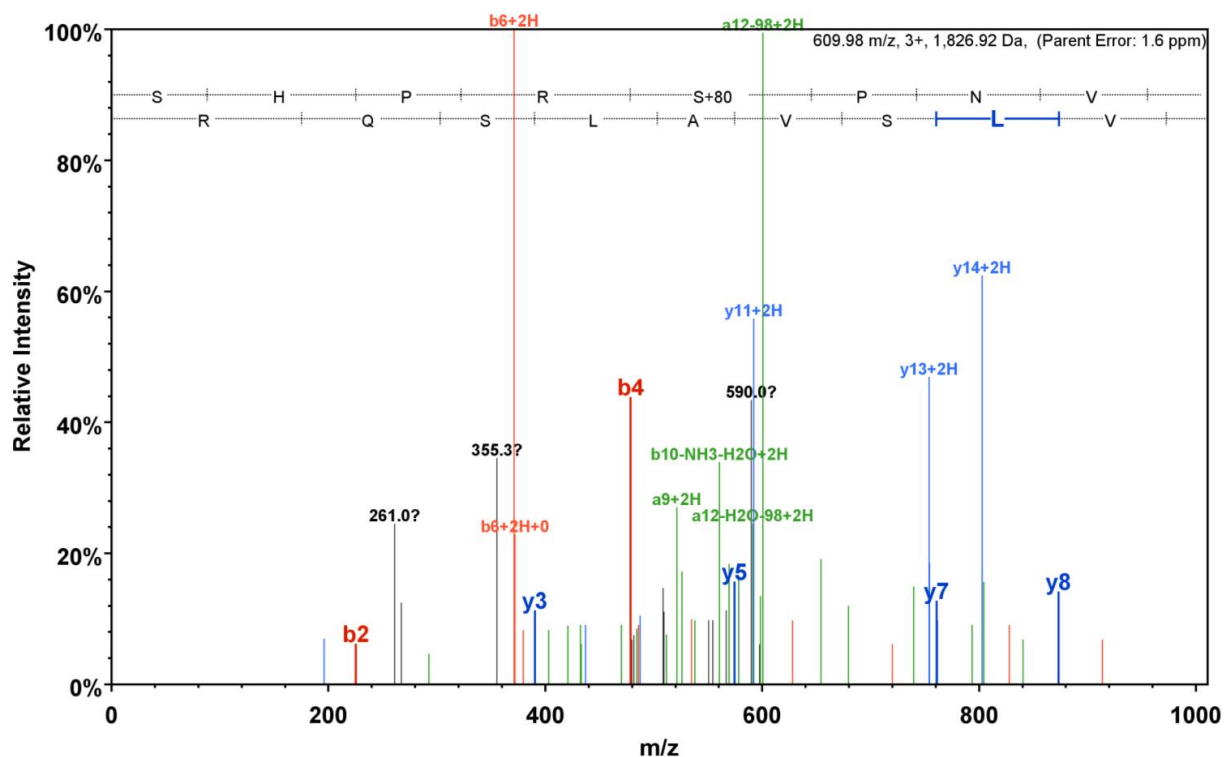

**Supplementary Fig.4: MS/MS spectrum and fragmentation table of peptide**

<sup>683</sup>SHPR**S**PNVLSVALSQR<sup>698</sup> of HIF-1 $\alpha$ . The phosphorylated serine within the peptide sequence is underlined and marked as bold. Detected b ions are highlighted in red and y ions are highlighted in blue. Further signals which could be assigned to other types of fragments are highlighted in green.

**S687A:**

CLUSTAL 2.1 multiple sequence alignment

```
WT          TCCGCCCCATTGACGCAAATGGGCGGTAGGCGTGTACGGTGGGAGGTCTATATAAGCAGA 60
XL1A1       -----AAGCAGA 7
                      *****

WT          GCTCTCTGGCTAACTAGAGAACCCACTGCTTACTGGCTTATCGAAATTAATACGACTCAC 120
XL1A1       GCTCTCTGGCTAACTAGAGAACCCACTGCTTACTGGCTTATCGAAATTAATACGACTCAC 67
                      *****

WT          TATAGGGAGACCCAAGCTTACCATGGCCTACCCNTACGACGTGCCCGACTACGCCTCCCT 180
XL1A1       TATAGGGAGACCCAAGCTTACCATGGCCTACCCCTACGACGTGCCCGACTACGCCTCCCT 127
                      *****

WT          CGGATCCGCCACCATGGAGGGCGCCGGCGGCGGAACGACAAGAAAAAGATAAGTTCTGA 240
XL1A1       CGGATCCGCCACCATGGAGGGCGCCGGCGGCGGAACGACAAGAAAAAGATAAGTTCTGA 187
                      *****

WT          ACGTCGAAAAGAAAAGTCTCGAGATGCAGCCAGATCTCGGCGAAGTAAAGAATCTGAAGT 300
XL1A1       ACGTCGAAAAGAAAAGTCTCGAGATGCAGCCAGATCTCGGCGAAGTAAAGAATCTGAAGT 247
                      *****

WT          TTTTATGAGCTTGCTCATCAGTTGCCACTTCCACATAATGTGAGTTCGCATCTTGATAA 360
XL1A1       TTTTATGAGCTTGCTCATCAGTTGCCACTTCCACATAATGTGAGTTCGCATCTTGATAA 307
                      *****

WT          GGCCTCTGTGATGAGGCTTACCATCAGCTATTTGCGTGTGAGGAACTTCTGGATGCTGG 420
XL1A1       GGCCTCTGTGATGAGGCTTACCATCAGCTATTTGCGTGTGAGGAACTTCTGGATGCTGG 367
                      *****

WT          TGATTTGGATATTGAAGATGACATGAAAGCACAGATGAATTGCTTTTATTTGAAAGCCTT 480
XL1A1       TGATTTGGATATTGAAGATGACATGAAAGCACAGATGAATTGCTTTTATTTGAAAGCCTT 427
                      *****

WT          GGATGGTTTTGTTATGGTTCTCACAGATGATGGTGACATGATTACATTTCTGATAATGT 540
XL1A1       GGATGGTTTTGTTATGGTTCTCACAGATGATGGTGACATGATTACATTTCTGATAATGT 487
                      *****

WT          GAACAAATACATGGGATTAAGTCACTTTGAAGTAACTGGACACAGTGTGTTGATTTTAC 600
XL1A1       GAACAAATACATGGGATTAAGTCACTTTGAAGTAACTGGACACAGTGTGTTGATTTTAC 547
                      *****

WT          TCATCCATGTGACCATGAGGAAATGAGAGAAATGCTTACACACAGAAATGGCCTTGTGAA 660
XL1A1       TCATCCATGTGACCATGAGGAAATGAGAGAAATGCTTACACACAGAAATGGCCTTGTGAA 607
                      *****

WT          AAAGGGTAAAGAACAAAACACACAGCGAAGCTTTTTTCTCAGAATGAAGTGTACCCTAAC 720
XL1A1       AAAGGGTAAAGAACAAAACACACAGCGAAGCTTTTTTCTCAGAATGAAGTGTACCCTAAC 667
                      *****

WT          TAGCCGAGGAAGAACTATGAACATAAAGTCTGCAACATGGAAGGTATTGCACTGCACAGG 780
XL1A1       TAGCCGAGGAAGAACTATGAACATAAAGTCTGCAACATGGAAGGTATTGCACTGCACAGG 727
                      *****

WT          CCACATTCACGTATATGATACCAACAGTAACCAACCTCAGTGTGGGTATAAGAAACCACC 840
XL1A1       CCACATTCACGTATATGATACCAACAGTAACCAACCTCAGTGTGGGTATAAGAAACCACC 787
                      *****

WT          TATGACCTGCTTGGTGCTGATTGTGAACCCATTCCTCACCATCAAATATTGAAATTCC 900
XL1A1       TATGACCTGCTTGGTGCTGATTGTGAACCCATTCCTCACCATCAAATATTGAAATTCC 847
                      *****
```

|       |                                                               |      |
|-------|---------------------------------------------------------------|------|
| WT    | TTTAGATAGCAAGACTTTCTCAGTCGACACAGCCTGGATATGAAATTTTCTTATTGTGA   | 960  |
| XL1A1 | TTTAGATAGCAAGACTTTCTCAGTCGACACAGCCTGGATATGAAATTTTCTTATTGTGA   | 907  |
| ***** |                                                               |      |
| WT    | TGAAAGAATTACCGAATTGATGGGATATGAGCCAGAAGAACTTTTAGGCCGCTCAATTTA  | 1020 |
| XL1A1 | TGAAAGAATTACCGAATTGATGGGATATGAGCCAGAAGAACTTTTAGGCCGCTCAATTTA  | 967  |
| ***** |                                                               |      |
| WT    | TGAATATTATCATGCTTTGGACTCTGATCATCTGACCAAACTCATCATGATATGTTTAC   | 1080 |
| XL1A1 | TGAATATTATCATGCTTTGGACTCTGATCATCTGACCAAACTCATCATGATATGTTTAC   | 1027 |
| ***** |                                                               |      |
| WT    | TAAAGGACAAGTCACCACAGGACAGTACAGGATGCTTGCCAAAAGAGGTGGATATGTCTG  | 1140 |
| XL1A1 | TAAAGGACAAGTCACCACAGGACAGTACAGGATGCTTGCCAAAAGAGGTGGATATGTCTG  | 1087 |
| ***** |                                                               |      |
| WT    | GGTTGAAACTCAAGCAACTGTCTATATATAACACCAAGAATTCTCAACCACAGTGCATTGT | 1200 |
| XL1A1 | GGTTGAAACTCAAGCAACTGTCTATATATAACACCAAGAATTCTCAACCACAGTGCATTGT | 1147 |
| ***** |                                                               |      |
| WT    | ATGTGTGAATTACGTTGTGAGTGGTATTATTTCAGCACGACTTGATTTTCTCCCTTCAACA | 1260 |
| XL1A1 | ATGTGTGAATTACGTTGTGAGTGGTATTATTTCAGCACGACTTGATTTTCTCCCTTCAACA | 1207 |
| ***** |                                                               |      |
| WT    | AACAGAATGTGTCCTTAAACCGGTTGAATCTTCAGATATGAAAATGACTCAGCTATTTCAC | 1320 |
| XL1A1 | AACAGAATGTGTCCTTAAACCGGTTGAATCTTCAGATATGAAAATGACTCAGCTATTTCAC | 1267 |
| ***** |                                                               |      |
| WT    | CAAAGTTGAATCAGAAGATACAAGTAGCCTCTTTGACAAACTTAAGAAGGAACCTGATGC  | 1380 |
| XL1A1 | CAAAGTTGAATCAGAAGATACAAGTAGCCTCTTTGACAAACTTAAGAAGGAACCTGATGC  | 1327 |
| ***** |                                                               |      |
| WT    | TTTAACTTTGCTGGCCCCAGCCGCTGGAGACACAATCATATCTTTAGATTTTGGCAGCAA  | 1440 |
| XL1A1 | TTTAACTTTGCTGGCCCCAGCCGCTGGAGACACAATCATATCTTTAGATTTTGGCAGCAA  | 1387 |
| ***** |                                                               |      |
| WT    | CGACACAGAACTGATGACCAGCAACTTGAGGAAGTACCATTATATAATGATGTAATGCT   | 1500 |
| XL1A1 | CGACACAGAACTGATGACCAGCAACTTGAGGAAGTACCATTATATAATGATGTAATGCT   | 1447 |
| ***** |                                                               |      |
| WT    | CCCCTCACCAACGAAAAATTACAGAATATAAATTTGGCAATGTCTCCATTACCCACCGC   | 1560 |
| XL1A1 | CCCCTCACCAACGAAAAATTACAGAATATAAATTTGGCAATGTCTCCATTACCCACCGC   | 1507 |
| ***** |                                                               |      |
| WT    | TGAAACGCCAAAGCCACTTCGAAGTAGTGCTGACCCTGCACTCAATCAAGAAGTTGCATT  | 1620 |
| XL1A1 | TGAAACGCCAAAGCCACTTCGAAGTAGTGCTGACCCTGCACTCAATCAAGAAGTTGCATT  | 1567 |
| ***** |                                                               |      |
| WT    | AAAATTAGAACCAATCCAGAGTCACTGGAACCTTCTTTTACCATGCCCCAGATTCAGGA   | 1680 |
| XL1A1 | AAAATTAGAACCAATCCAGAGTCACTGGAACCTTCTTTTACCATGCCCCAGATTCAGGA   | 1627 |
| ***** |                                                               |      |
| WT    | TCAGACACCTAGTCCTTCCGATGGAAGCACTAGACAAAGTTACCTGAGCCTAATAGTCC   | 1740 |
| XL1A1 | TCAGACACCTAGTCCTTCCGATGGAAGCACTAGACAAAGTTACCTGAGCCTAATAGTCC   | 1687 |
| ***** |                                                               |      |
| WT    | CAGTGAATATTGTTTTTATGTGGATAGTGATATGGTCAATGAATTCAAGTTGGAATTGGT  | 1800 |
| XL1A1 | CAGTGAATATTGTTTTTATGTGGATAGTGATATGGTCAATGAATTCAAGTTGGAATTGGT  | 1747 |
| ***** |                                                               |      |
| WT    | AGAAAACTTTTGTGCTGAAGACACAGAAGCAAAGAACCATTCTTCTACTCAGGACACAGA  | 1860 |
| XL1A1 | AGAAAACTTTTGTGCTGAAGACACAGAAGCAAAGAACCATTCTTCTACTCAGGACACAGA  | 1807 |
| ***** |                                                               |      |

|       |                                                              |      |
|-------|--------------------------------------------------------------|------|
| WT    | TTTAGACTTGGAGATGTTAGCTCCCTATATCCCAATGGATGATGACTTCCAGTTACGTTT | 1920 |
| XL1A1 | TTTAGACTTGGAGATGTTAGCTCCCTATATCCCAATGGATGATGACTTCCAGTTACGTTT | 1867 |
| ***** |                                                              |      |
| WT    | CTTCGATCAGTTGTCAACATTAGAAAGCAGTTCGCAAGCCCTGAAAGCGCAAGTCCTCA  | 1980 |
| XL1A1 | CTTCGATCAGTTGTCAACATTAGAAAGCAGTTCGCAAGCCCTGAAAGCGCAAGTCCTCA  | 1927 |
| ***** |                                                              |      |
| WT    | AAGCACAGTTACAGTATTCCAGCAGACTCAAATACAAGAACCTACTGCTAATGCCACCAC | 2040 |
| XL1A1 | AAGCACAGTTACAGTATTCCAGCAGACTCAAATACAAGAACCTACTGCTAATGCCACCAC | 1987 |
| ***** |                                                              |      |
| WT    | TACCACTGCCACCACTGATGAATTAAAAACAGTGACAAAAGACCGTATGGAAGACATTAA | 2100 |
| XL1A1 | TACCACTGCCACCACTGATGAATTAAAAACAGTGACAAAAGACCGTATGGAAGACATTAA | 2047 |
| ***** |                                                              |      |
| WT    | AATATTGATTGCATCTCCATCTCCTACCCACATACATAAAGAACTACTAGTGCCACATC  | 2160 |
| XL1A1 | AATATTGATTGCATCTCCATCTCCTACCCACATACATAAAGAACTACTAGTGCCACATC  | 2107 |
| ***** |                                                              |      |
| WT    | ATCACCATATAGAGATACTCAAAGTCGGACAGCCTCACCAAACAGAGCAGGAAAAGGAGT | 2220 |
| XL1A1 | ATCACCATATAGAGATACTCAAAGTCGGACAGCCTCACCAAACAGAGCAGGAAAAGGAGT | 2167 |
| ***** |                                                              |      |
| WT    | CATAGAACAGACAGAAAAATCTCATCCAAGAAGCCCTAACGTGTTATCTGTCGCTTTGAG | 2280 |
| XL1A1 | CATAGAACAGACAGAAAAATCTCATCCAAGAAGCCCTAACGTGTTATCTGTCGCTTTGAG | 2227 |
| ***** |                                                              |      |
| WT    | TCAAAGAACTACAGTTCCTGAGGAAGAACTAAATCCAAAGATACTAGCTTTGCAGAATGC | 2340 |
| XL1A1 | TCAAAGAACTACAGTTCCTGAGGAAGAACTAAATCCAAAGATACTAGCTTTGCAGAATGC | 2287 |
| ***** |                                                              |      |
| WT    | TCAGAGAAAGCGAAAAATGGAACATGATGGTTCACTTTTTCAAGCAGTAGGAATTGGAAC | 2400 |
| XL1A1 | TCAGAGAAAGCGAAAAATGGAACATGATGGTTCACTTTTTCAAGCAGTAGGAATTGGAAC | 2347 |
| ***** |                                                              |      |
| WT    | ATTATTACAGCAGCCAGACGATCATGCAGCTACTACATCACTTTCTTGAAACGTGTAAA  | 2460 |
| XL1A1 | ATTATTACAGCAGCCAGACGATCATGCAGCTACTACATCACTTTCTTGAAACGTGTAAA  | 2407 |
| ***** |                                                              |      |
| WT    | AGGATGCAAATCTAGTGAACAGAATGGAATGGAGCAAAGACAATTATTTTAATACCCTC  | 2520 |
| XL1A1 | AGGATGCAAATCTAGTGAACAGAATGGAATGGAGCAAAGACAATTATTTTAATACCCTC  | 2467 |
| ***** |                                                              |      |
| WT    | TGATTTAGCATGTAGACTGCTGGGGCAATCAATGGATGAAAGTGGATTACCACAGCTGAC | 2580 |
| XL1A1 | TGATTTAGCATGTAGACTGCTGGGGCAATCAATGGATGAAAGTGGATTACCACAGCTGAC | 2527 |
| ***** |                                                              |      |
| WT    | CAGTTATGATTGTGAAGTTAATGCTCCTATACAAGGCAGCAGAAACCTACTGCAGGGTGA | 2640 |
| XL1A1 | CAGTTATGATTGTGAAGTTAATGCTCCTATACAAGGCAGCAGAAACCTACTGCAGGGTGA | 2587 |
| ***** |                                                              |      |
| WT    | AGAATTACTCAGAGCTTTGGATCAAGTTAACTGACAATTCTGCAGATATCCATCAGCTG  | 2700 |
| XL1A1 | AGAATTACTCAGAGCTTTGGATCAAGTTAACTGACAATTCTGCAGATATCCATCAGCTG  | 2647 |
| ***** |                                                              |      |
| WT    | GCGGCCGCTCGAGCATGCATCTAGAGG                                  | 2727 |
| XL1A1 | GCGGCC-----                                                  | 2653 |

**S687E:**

CLUSTAL 2.1 multiple sequence alignment

```
WT          TCCGCCCCATTGACGCAAATGGGCGGTAGGCGTGTACGGTGGGAGGTCTATATAAGCAGA 60
XL1E11      -----CAGA 4
                                     ****

WT          GCTCTCTGGCTAACTAGAGAACCCACTGCTTACTGGCTTATCGAAATTAATACGACTCAC 120
XL1E11      GCTCTCTGGCTAACTAGAGAACCCACTGCTTACTGGCTTATCGAAATTAATACGACTCAC 64
               *****

WT          TATAGGGAGACCCAAGCTTACCATGGCCTACCCNTACGACGTGCCCGACTACGCCTCCCT 180
XL1E11      TATAGGGAGACCCAAGCTTACCATGGCCTACCCCTACGACGTGCCCGACTACGCCTCCCT 124
               *****

WT          CGGATCCGCCACCATGGAGGGCGCCGGCGGCGGAACGACAAGAAAAAGATAAGTTCTGA 240
XL1E11      CGGATCCGCCACCATGGAGGGCGCCGGCGGCGGAACGACAAGAAAAAGATAAGTTCTGA 184
               *****

WT          ACGTCGAAAAGAAAAGTCTCGAGATGCAGCCAGATCTCGGCGAAGTAAAGAATCTGAAGT 300
XL1E11      ACGTCGAAAAGAAAAGTCTCGAGATGCAGCCAGATCTCGGCGAAGTAAAGAATCTGAAGT 244
               *****

WT          TTTTATGAGCTTGCTCATCAGTTGCCACTTCCACATAATGTGAGTTCGCATCTTGATAA 360
XL1E11      TTTTATGAGCTTGCTCATCAGTTGCCACTTCCACATAATGTGAGTTCGCATCTTGATAA 304
               *****

WT          GGCCTCTGTGATGAGGCTTACCATCAGCTATTTGCGTGTGAGGAACTTCTGGATGCTGG 420
XL1E11      GGCCTCTGTGATGAGGCTTACCATCAGCTATTTGCGTGTGAGGAACTTCTGGATGCTGG 364
               *****

WT          TGATTTGGATATTGAAGATGACATGAAAGCACAGATGAATTGCTTTTATTTGAAAGCCTT 480
XL1E11      TGATTTGGATATTGAAGATGACATGAAAGCACAGATGAATTGCTTTTATTTGAAAGCCTT 424
               *****

WT          GGATGGTTTTGTTATGGTTCTCACAGATGATGGTGACATGATTACATTTCTGATAATGT 540
XL1E11      GGATGGTTTTGTTATGGTTCTCACAGATGATGGTGACATGATTACATTTCTGATAATGT 484
               *****

WT          GAACAAATACATGGGATTAACTCAGTTTGAACAACTGGACACAGTGTGTTTGATTTTAC 600
XL1E11      GAACAAATACATGGGATTAACTCAGTTTGAACAACTGGACACAGTGTGTTTGATTTTAC 544
               *****

WT          TCATCCATGTGACCATGAGGAAATGAGAGAAATGCTTACACACAGAAATGGCCTTGTA 660
XL1E11      TCATCCATGTGACCATGAGGAAATGAGAGAAATGCTTACACACAGAAATGGCCTTGTA 604
               *****

WT          AAAGGGTAAAGAACAAAACACACAGCGAAGCTTTTTCTCAGAATGAAGTGTAACCTAAC 720
XL1E11      AAAGGGTAAAGAACAAAACACACAGCGAAGCTTTTTCTCAGAATGAAGTGTAACCTAAC 664
               *****

WT          TAGCCGAGGAAGAACTATGAACATAAAGTCTGCAACATGGAAGGTATTGCACTGCACAGG 780
XL1E11      TAGCCGAGGAAGAACTATGAACATAAAGTCTGCAACATGGAAGGTATTGCACTGCACAGG 724
               *****

WT          CCACATTCACGTATATGATACCAACAGTAACCAACCTCAGTGTGGGTATAAGAAACCACC 840
XL1E11      CCACATTCACGTATATGATACCAACAGTAACCAACCTCAGTGTGGGTATAAGAAACCACC 784
               *****

WT          TATGACCTGCTTGGTGCTGATTTGTGAACCCATTCCTCACCCTCAAAATATTGAAATTCC 900
XL1E11      TATGACCTGCTTGGTGCTGATTTGTGAACCCATTCCTCACCCTCAAAATATTGAAATTCC 844
               *****
```

|        |                                                               |      |
|--------|---------------------------------------------------------------|------|
| WT     | TTTAGATAGCAAGACTTTCCTCAGTCGACACAGCCTGGATATGAAATTTTCTTATTGTGA  | 960  |
| XL1E11 | TTTAGATAGCAAGACTTTCCTCAGTCGACACAGCCTGGATATGAAATTTTCTTATTGTGA  | 964  |
| *****  |                                                               |      |
| WT     | TGAAAGAATTACCGAATTGATGGGATATGAGCCAGAAGAACTTTTAGGCCGCTCAATTTA  | 1020 |
| XL1E11 | TGAAAGAATTACCGAATTGATGGGATATGAGCCAGAAGAACTTTTAGGCCGCTCAATTTA  | 964  |
| *****  |                                                               |      |
| WT     | TGAATATTATCATGCTTTGGACTCTGATCATCTGACCAAACTCATCATGATATGTTTAC   | 1080 |
| XL1E11 | TGAATATTATCATGCTTTGGACTCTGATCATCTGACCAAACTCATCATGATATGTTTAC   | 1024 |
| *****  |                                                               |      |
| WT     | TAAAGGACAAGTCACCACAGGACAGTACAGGATGCTTGCCAAAAGAGGTGGATATGTCTG  | 1140 |
| XL1E11 | TAAAGGACAAGTCACCACAGGACAGTACAGGATGCTTGCCAAAAGAGGTGGATATGTCTG  | 1084 |
| *****  |                                                               |      |
| WT     | GGTTGAAACTCAAGCAACTGTCTATATATAACACCAAGAATTCTCAACCACAGTGCATTGT | 1200 |
| XL1E11 | GGTTGAAACTCAAGCAACTGTCTATATATAACACCAAGAATTCTCAACCACAGTGCATTGT | 1144 |
| *****  |                                                               |      |
| WT     | ATGTGTGAATTACGTTGTGAGTGGTATTATTTCAGCACGACTTGATTTTCTCCCTTCAACA | 1260 |
| XL1E11 | ATGTGTGAATTACGTTGTGAGTGGTATTATTTCAGCACGACTTGATTTTCTCCCTTCAACA | 1204 |
| *****  |                                                               |      |
| WT     | AACAGAATGTGTCCTTAAACCGGTTGAATCTTCAGATATGAAAATGACTCAGCTATTAC   | 1320 |
| XL1E11 | AACAGAATGTGTCCTTAAACCGGTTGAATCTTCAGATATGAAAATGACTCAGCTATTAC   | 1264 |
| *****  |                                                               |      |
| WT     | CAAAGTTGAATCAGAAGATACAAGTAGCCTCTTTGACAACTTAAGAAGGAACCTGATGC   | 1380 |
| XL1E11 | CAAAGTTGAATCAGAAGATACAAGTAGCCTCTTTGACAACTTAAGAAGGAACCTGATGC   | 1324 |
| *****  |                                                               |      |
| WT     | TTTAACCTTTGCTGGCCCCAGCCGCTGGAGACACAATCATATCTTTAGATTTTGGCAGCAA | 1440 |
| XL1E11 | TTTAACCTTTGCTGGCCCCAGCCGCTGGAGACACAATCATATCTTTAGATTTTGGCAGCAA | 1384 |
| *****  |                                                               |      |
| WT     | CGACACAGAACTGATGACCAGCAACTTGAGGAAGTACCATTATATAATGATGTAATGCT   | 1500 |
| XL1E11 | CGACACAGAACTGATGACCAGCAACTTGAGGAAGTACCATTATATAATGATGTAATGCT   | 1444 |
| *****  |                                                               |      |
| WT     | CCCCTCACCCAACGAAAAATTACAGAATATAAATTTGGCAATGTCTCCATTACCCACCGC  | 1560 |
| XL1E11 | CCCCTCACCCAACGAAAAATTACAGAATATAAATTTGGCAATGTCTCCATTACCCACCGC  | 1504 |
| *****  |                                                               |      |
| WT     | TGAAACGCCAAAGCCACTTCGAAGTAGTGCTGACCCTGCACTCAATCAAGAAGTTGCATT  | 1620 |
| XL1E11 | TGAAACGCCAAAGCCACTTCGAAGTAGTGCTGACCCTGCACTCAATCAAGAAGTTGCATT  | 1564 |
| *****  |                                                               |      |
| WT     | AAAATTAGAACCAAATCCAGAGTCACTGGAACCTTCTTTTACCATGCCCCAGATTAGGA   | 1680 |
| XL1E11 | AAAATTAGAACCAAATCCAGAGTCACTGGAACCTTCTTTTACCATGCCCCAGATTAGGA   | 1624 |
| *****  |                                                               |      |
| WT     | TCAGACACCTAGTCCTTCCGATGGAAGCACTAGACAAAGTTCACCTGAGCCTAATAGTCC  | 1740 |
| XL1E11 | TCAGACACCTAGTCCTTCCGATGGAAGCACTAGACAAAGTTCACCTGAGCCTAATAGTCC  | 1684 |
| *****  |                                                               |      |
| WT     | CAGTGAATATTGTTTTATGTGGATAGTGATATGGTCAATGAATTCAAGTTGGAATTGGT   | 1800 |
| XL1E11 | CAGTGAATATTGTTTTATGTGGATAGTGATATGGTCAATGAATTCAAGTTGGAATTGGT   | 1744 |
| *****  |                                                               |      |
| WT     | AGAAAACTTTTGTGTAAGACACAGAAGCAAAGAACCATTCTTCTACTCAGGACACAGA    | 1860 |
| XL1E11 | AGAAAACTTTTGTGTAAGACACAGAAGCAAAGAACCATTCTTCTACTCAGGACACAGA    | 1804 |
| *****  |                                                               |      |

|        |                                                              |      |
|--------|--------------------------------------------------------------|------|
| WT     | TTTAGACTTGGAGATGTTAGCTCCCTATATCCCAATGGATGATGACTTCCAGTTACGTTT | 1920 |
| XL1E11 | TTTAGACTTGGAGATGTTAGCTCCCTATATCCCAATGGATGATGACTTCCAGTTACGTTT | 1864 |
| *****  |                                                              |      |
| WT     | CTTCGATCAGTTGTCAACATTAGAAAGCAGTTCGCAAGCCCTGAAAGCGCAAGTCCTCA  | 1980 |
| XL1E11 | CTTCGATCAGTTGTCAACATTAGAAAGCAGTTCGCAAGCCCTGAAAGCGCAAGTCCTCA  | 1924 |
| *****  |                                                              |      |
| WT     | AAGCACAGTTACAGTATTCCAGCAGACTCAAATACAAGAACCTACTGCTAATGCCACCAC | 2040 |
| XL1E11 | AAGCACAGTTACAGTATTCCAGCAGACTCAAATACAAGAACCTACTGCTAATGCCACCAC | 1984 |
| *****  |                                                              |      |
| WT     | TACCACTGCCACCACTGATGAATTAAAAACAGTGACAAAAGACCGTATGGAAGACATTAA | 2100 |
| XL1E11 | TACCACTGCCACCACTGATGAATTAAAAACAGTGACAAAAGACCGTATGGAAGACATTAA | 2044 |
| *****  |                                                              |      |
| WT     | AATATTGATTGCATCTCCATCTCCTACCCACATACATAAAGAACTACTAGTGCCACATC  | 2160 |
| XL1E11 | AATATTGATTGCATCTCCATCTCCTACCCACATACATAAAGAACTACTAGTGCCACATC  | 2104 |
| *****  |                                                              |      |
| WT     | ATCACCATATAGAGATACTCAAAGTCGGACAGCCTCACCAAACAGAGCAGGAAAAGGAGT | 2220 |
| XL1E11 | ATCACCATATAGAGATACTCAAAGTCGGACAGCCTCACCAAACAGAGCAGGAAAAGGAGT | 2164 |
| *****  |                                                              |      |
| WT     | CATAGAACAGACAGAAAAATCTCATCCAAGAAGCCCTAACGTGTTATCTGTCGCTTTGAG | 2280 |
| XL1E11 | CATAGAACAGACAGAAAAATCTCATCCAAGAAGCCCTAACGTGTTATCTGTCGCTTTGAG | 2224 |
| *****  |                                                              |      |
| WT     | TCAAAGAACTACAGTTCCTGAGGAAGAACTAAATCCAAAGATACTAGCTTTGCAGAATGC | 2340 |
| XL1E11 | TCAAAGAACTACAGTTCCTGAGGAAGAACTAAATCCAAAGATACTAGCTTTGCAGAATGC | 2284 |
| *****  |                                                              |      |
| WT     | TCAGAGAAAGCGAAAAATGGAACATGATGGTTCACTTTTTCAAGCAGTAGGAATTGGAAC | 2400 |
| XL1E11 | TCAGAGAAAGCGAAAAATGGAACATGATGGTTCACTTTTTCAAGCAGTAGGAATTGGAAC | 2344 |
| *****  |                                                              |      |
| WT     | ATTATTACAGCAGCCAGACGATCATGCAGCTACTACATCACTTTCTTGAAACGTGTAAA  | 2460 |
| XL1E11 | ATTATTACAGCAGCCAGACGATCATGCAGCTACTACATCACTTTCTTGAAACGTGTAAA  | 2404 |
| *****  |                                                              |      |
| WT     | AGGATGCAAATCTAGTGAACAGAATGGAATGGAGCAAAGACAATTATTTTAATACCCTC  | 2520 |
| XL1E11 | AGGATGCAAATCTAGTGAACAGAATGGAATGGAGCAAAGACAATTATTTTAATACCCTC  | 2464 |
| *****  |                                                              |      |
| WT     | TGATTTAGCATGTAGACTGCTGGGGCAATCAATGGATGAAAGTGGATTACCACAGCTGAC | 2580 |
| XL1E11 | TGATTTAGCATGTAGACTGCTGGGGCAATCAATGGATGAAAGTGGATTACCACAGCTGAC | 2524 |
| *****  |                                                              |      |
| WT     | CAGTTATGATTGTGAAGTTAATGCTCCTATACAAGGCAGCAGAAACCTACTGCAGGGTGA | 2640 |
| XL1E11 | CAGTTATGATTGTGAAGTTAATGCTCCTATACAAGGCAGCAGAAACCTACTGCAGGGTGA | 2584 |
| *****  |                                                              |      |
| WT     | AGAATTACTCAGAGCTTTGGATCAAGTTAACTGACAATTCTGCAGATATCCATCACACTG | 2700 |
| XL1E11 | AGAATTACTCAGAGCTTTGGATCAAGTTAACTGACAATTCTGCAGATATCCATCACACTG | 2644 |
| *****  |                                                              |      |
| WT     | GCGGCCGCT-CGAGCATGCATCTAGAGG                                 | 2727 |
| XL1E11 | GCGGCCGCTTCGA-----                                           | 2657 |
| *****  |                                                              |      |

**Supplementary Fig. 5: Point mutations at serine 687 to either alanine or glutamate were introduced in HIF-1 $\alpha$  by site-directed mutagenesis.** Sequence alignment of wildtype HIF-1 $\alpha$  (wt) with the alanine (clone XL1A1) and glutamate (clone XL1E11) mutant of serine 687 is shown. Mutated sites are indicated in red.

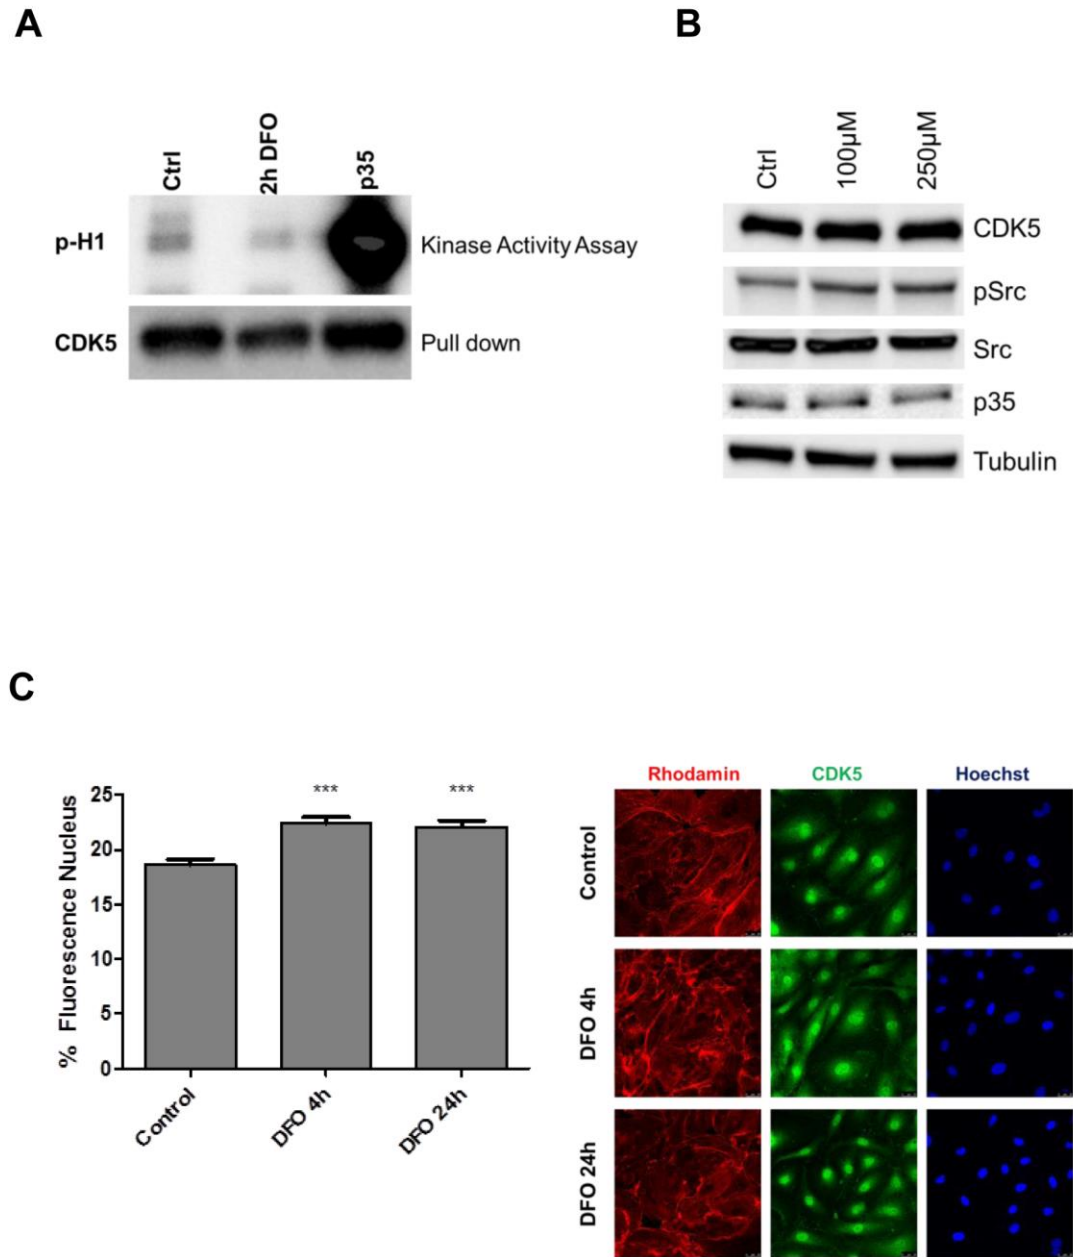

**Supplementary Fig. 6: CDK5 is not directly activated by DFO treatment, but is enriched in the nucleus. (A)** Kinase assay in HUVECs treated with 100  $\mu$ M DFO for 2h: no increase of Histone 1 phosphorylation can be detected. Overexpression of p35 served as positive control. **(B)** Neither the CDK5 activator p35, nor phosphorylation of the downstream target pSrc is increased by DFO treatment. **(C)** Left panel: Quantitative analysis of CDK5 in the cytoplasm and the nucleus by confocal microscopy shows enrichment of CDK5 in the nucleus. Right: representative images for staining of CDK5 (green), Hoechst (blue, for identification of nuclei), and F-actin (Rhodamin phalloidin, as indicator of cell morphology).

#### **References:**

1. Ehrlich SM, Liebl J, Ardelt MA, et al. Targeting cyclin dependent kinase 5 in hepatocellular carcinoma - a novel therapeutic approach. J Hepatol 2015.
2. van den Heuvel S, Harlow E. Distinct roles for cyclin-dependent kinases in cell cycle control. Science 1993;262:2050-4.
3. Baker SJ, Markowitz S, Fearon ER, et al. Suppression of human colorectal carcinoma cell growth by wild-type p53. Science 1990;249:912-5.
4. Kondo K, Kiko J, Nakamura E, et al. Inhibition of HIF is necessary for tumor suppression by the von Hippel-Lindau protein. Cancer Cell 2002;1:237-46.
